# Supplementary material
Source: PubMed Central journal article supplement (PMC10516509)
Supplement: NIHMS1924862-supplement-Figure_permission_Fig_s10.pdf [file NIHMS1924862-supplement-Figure_permission_Fig_s10.pdf]

July 21, 2023

Greetings Dr. Columbo and Dr. Goodney,

On behalf of the Society for Vascular Surgery Patient Safety Organization (SVS PSO), we have reviewed and approve of your request to use our graphic “Distribution of SVS VQI Physician Specialties”, which will be published in Circulation Cardiovascular Interventions. Additionally, we approve and grant Circulation Cardiovascular Interventions permission to reproduce and distribute this image, as part of your publication.

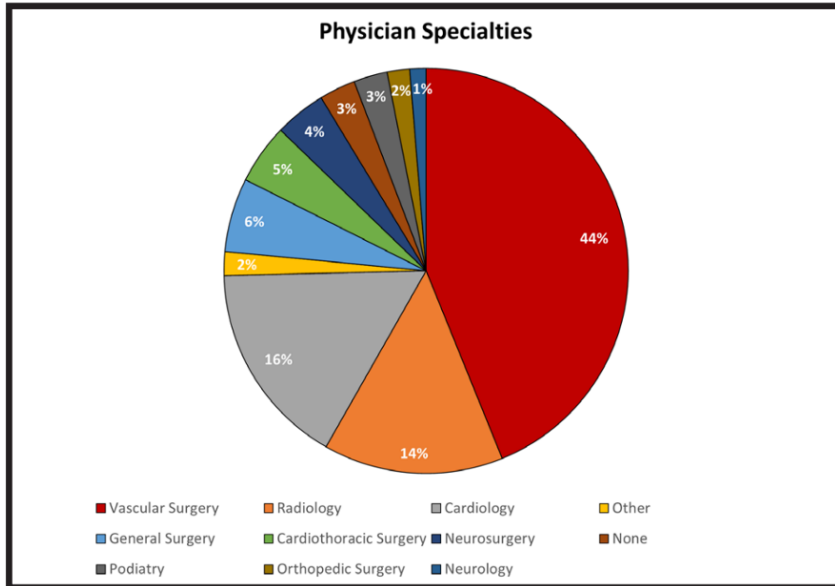

Source: Fivos PATHWAYS Data, Jan 2022

Figure 4.3: Distribution of SVS VQI Physician Specialties

Sincerely,

*James Wadzinski*

James Wadzinski  
SVS PSO Executive Director
