# Supplementary material
Source: PubMed Central journal article supplement (PMC10516509)
Supplement: NIHMS1924862-supplement-Supplemental_Publication_Material.pdf [file NIHMS1924862-supplement-Supplemental_Publication_Material.pdf]

## Supplementary Appendix

## **Table of Contents**

| <b>Item</b>                                                                                                                                                                                                                                                                                                                                                                                                                                                                                                                           | <b>Page Number</b> |
|---------------------------------------------------------------------------------------------------------------------------------------------------------------------------------------------------------------------------------------------------------------------------------------------------------------------------------------------------------------------------------------------------------------------------------------------------------------------------------------------------------------------------------------|--------------------|
| <b>Figure S1:</b> Annual number of TCARs performed, demonstrating the increasing utilization of this new procedure over time. TCAR indicates transcarotid artery revascularization.                                                                                                                                                                                                                                                                                                                                                   | 4                  |
| <b>Figure S2:</b> Regional uptake of TCAR overall, in 2017, 2020, and 2022, demonstrating the early uptake in the East, then overtaken by the Southern U.S. TCAR indicates transcarotid artery revascularization.                                                                                                                                                                                                                                                                                                                     | 5                  |
| <b>Figure S3:</b> Number of TCARs implanted and the number of centers performing them over time among <b>high-risk</b> patients. TCAR indicates transcarotid artery revascularization.                                                                                                                                                                                                                                                                                                                                                | 6                  |
| <b>Figure S4:</b> Number of TCARs implanted and the number of centers performing them over time among <b>standard-risk</b> patients. TCAR indicates transcarotid artery revascularization.                                                                                                                                                                                                                                                                                                                                            | 7                  |
| <b>Figure S5:</b> Relative percent market share of TCAR, CEA, and TF-CAS at centers reporting all procedures among <b>high-risk</b> patients. CEA indicates carotid endarterectomy; TCAR, transcarotid artery revascularization; and TF-CAS, transfemoral carotid artery stenting.                                                                                                                                                                                                                                                    | 8                  |
| <b>Figure S6:</b> Relative percent market share of TCAR, CEA, and TF-CAS at centers reporting all procedures among <b>standard-risk</b> patients. CEA indicates carotid endarterectomy; TCAR, transcarotid artery revascularization; and TF-CAS, transfemoral carotid artery stenting.                                                                                                                                                                                                                                                | 9                  |
| <b>Figure S7:</b> Scatter plot demonstrating the percent of procedures that an individual proceduralist performed in 2015 that were TF-CAS, against the percent of procedures performed by that same person in 2020 that were TF-CAS, TCAR, or CEA among all proceduralists with data in both timepoints (Panel A) and after limiting to proceduralists with at least 5 cases in 2015 (Panel B). CEA indicates carotid endarterectomy; TCAR, transcarotid artery revascularization; and TF-CAS, transfemoral carotid artery stenting. | 10                 |
| <b>Figure S8:</b> Density of propensity scores of <b>high-risk</b> patients receiving TCAR, CEA, and TF-CAS, demonstrating that patients receiving TCAR are similar to either CEA or TF-CAS patients, while patients receiving CEA and TF-CAS are relatively distinct from each other. CEA indicates carotid endarterectomy; TCAR, transcarotid artery revascularization; and TF-CAS, transfemoral carotid artery stenting.                                                                                                           | 11                 |
| <b>Figure S9:</b> Density of propensity scores of <b>standard-risk</b> patients                                                                                                                                                                                                                                                                                                                                                                                                                                                       | 12                 |

receiving TCAR, CEA, and TF-CAS, demonstrating that patients receiving TCAR are similar to either CEA or TF-CAS patients, while patients receiving CEA and TF-CAS are relatively distinct from each other. CEA indicates carotid endarterectomy; TCAR, transcarotid artery revascularization; and TF-CAS, transfemoral carotid artery stenting.

**Figure S10:** Distribution of SVS VQI Physician Specialties, available at: [vqi.org/wp-content/uploads/2022-Detailed-Annual-Report-FINAL.pdf](https://vqi.org/wp-content/uploads/2022-Detailed-Annual-Report-FINAL.pdf) 13  
SVS VQI indicates Society of Vascular Surgery Vascular Quality Initiative

**Table S1:** Characteristics of patients who underwent TF-CAS by year and overall. 14/15  
TF-CAS indicates transfemoral carotid artery stenting

**Table S2:** Characteristics of patients who underwent CEA by year and overall. 15/16  
CEA indicates carotid endarterectomy.

**Table S3:** TCAR uptake over time by region of the United States. 17

**Table S4:** Percent of carotid revascularization procedures that were 18  
TCAR in 2021/2022 stratified by TF-CAS use in 2015, determining whether centers who use TF-CAS more frequently were also more or less likely to utilize TCAR over time

**Table S5:** Risk of in-hospital stroke or death after TCAR when stratified by 19  
proceduralist- or center-level annual TCAR volume.

**Figure S1:** Annual number of TCARs performed, demonstrating the increasing utilization of this new procedure over time.

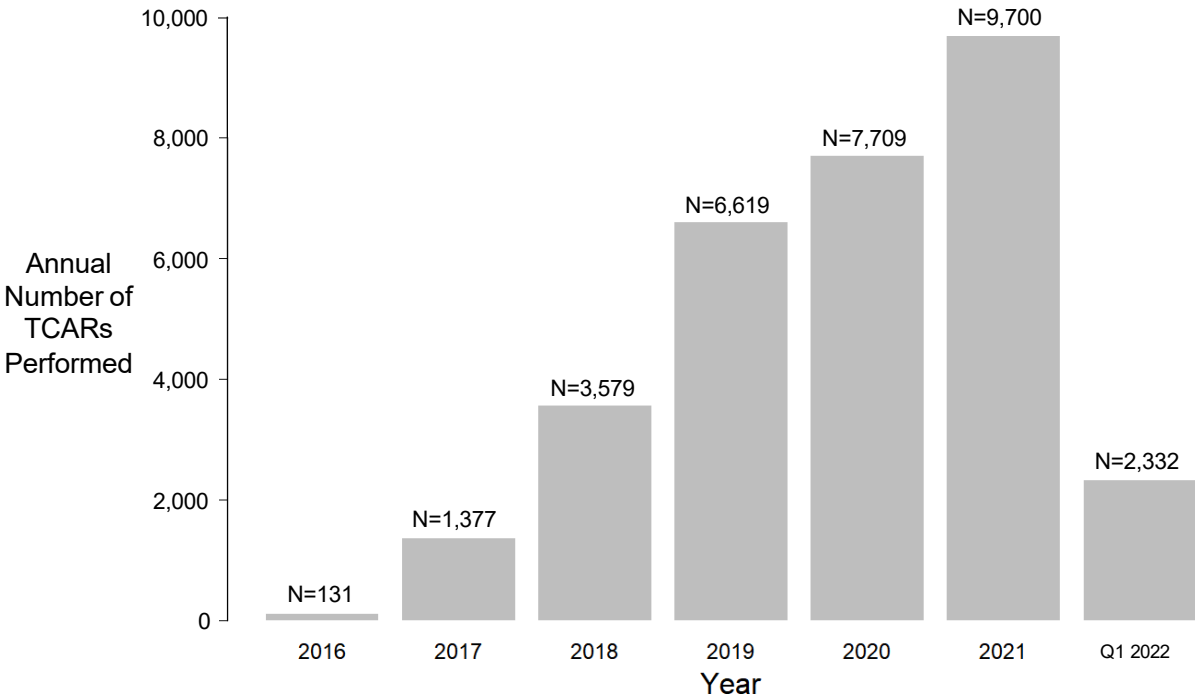

**Figure S2:** Regional uptake of TCAR overall, in 2017, 2020, and 2022, demonstrating the early uptake in the East, then overtaken by the Southern U.S.

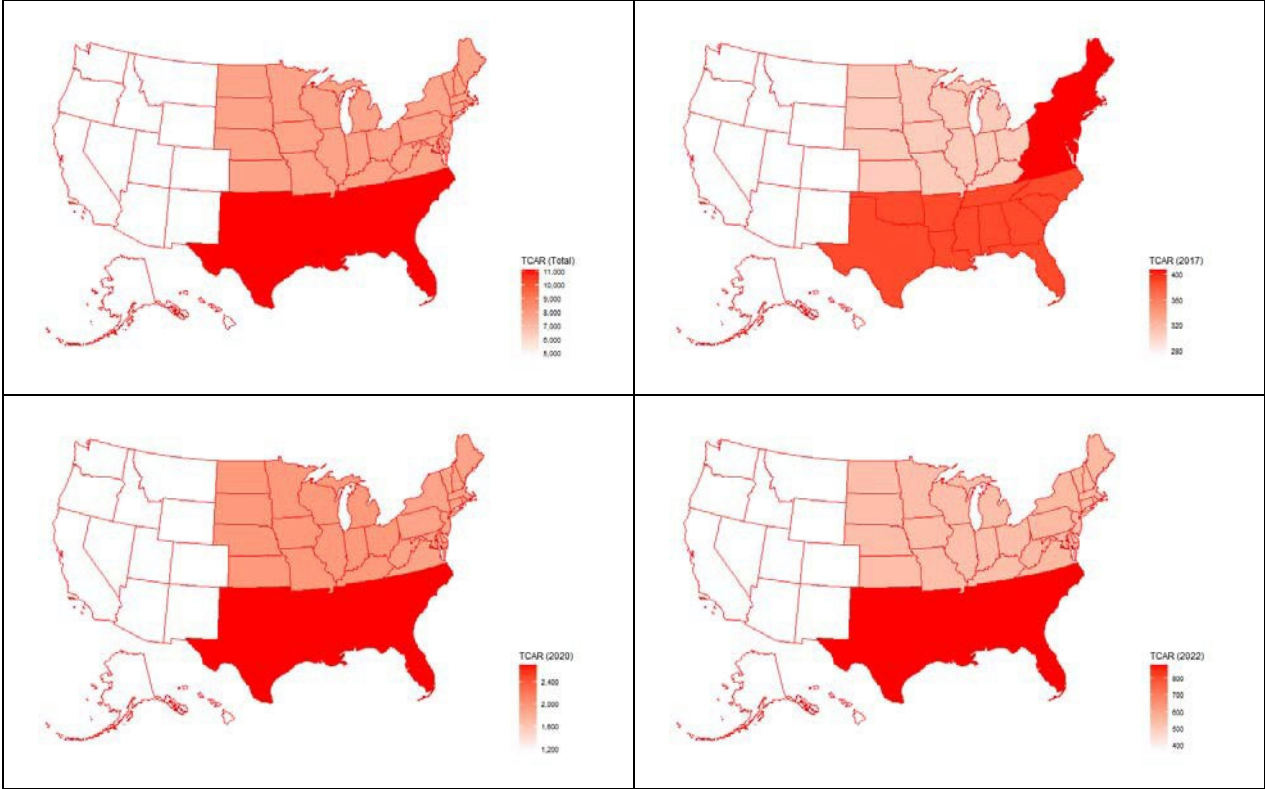

**Figure S3:** Number of TCARs implanted and the number of centers performing them over time among **high-risk** patients.

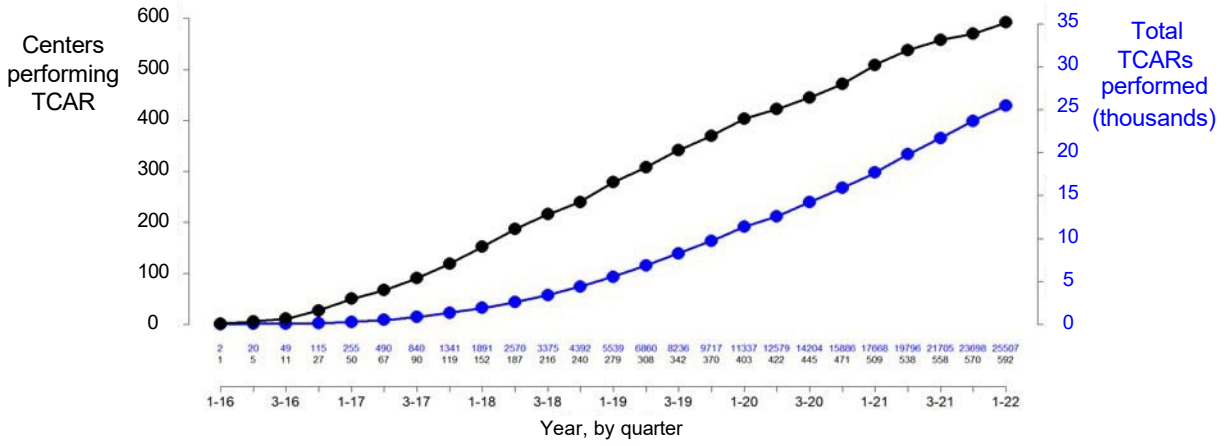

**Figure S4:** Number of TCARs implanted and the number of centers performing them over time among **standard-risk** patients.

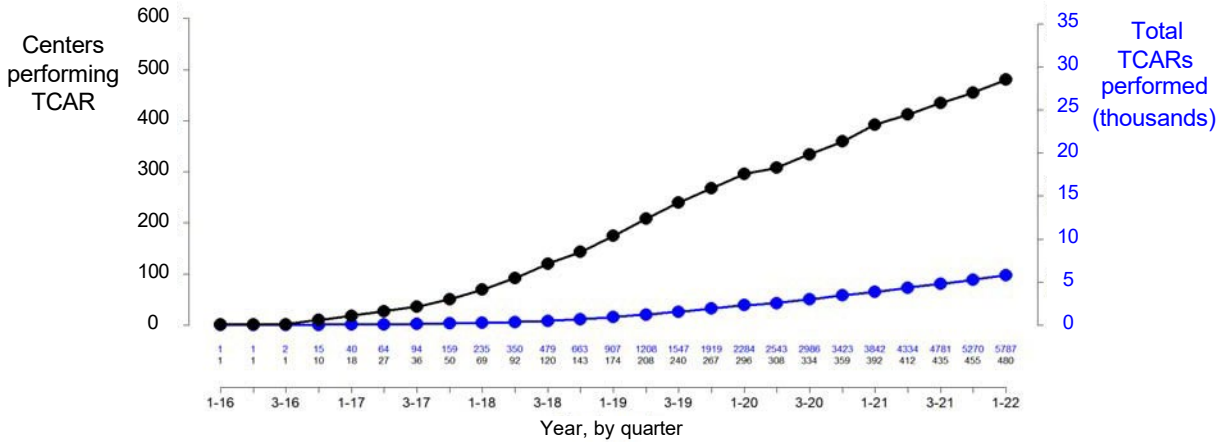

**Figure S5:** Relative percent market share of TCAR, CEA, and TF-CAS at centers reporting all procedures among high-risk patients.

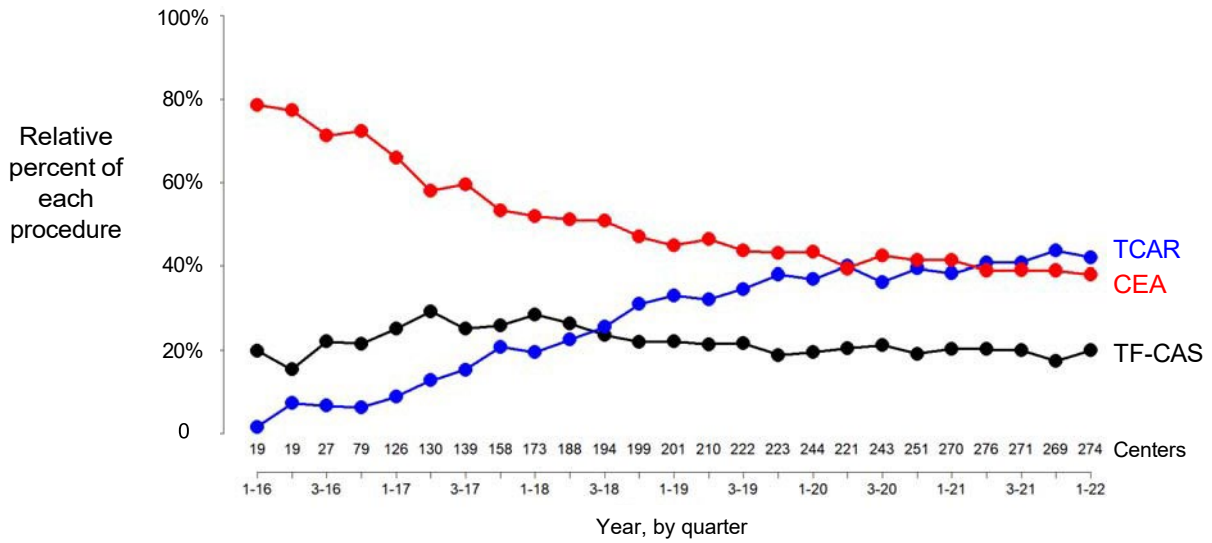



**Figure S6:** Relative percent market share of TCAR, CEA, and TF-CAS at centers reporting all procedures among **standard-risk** patients.

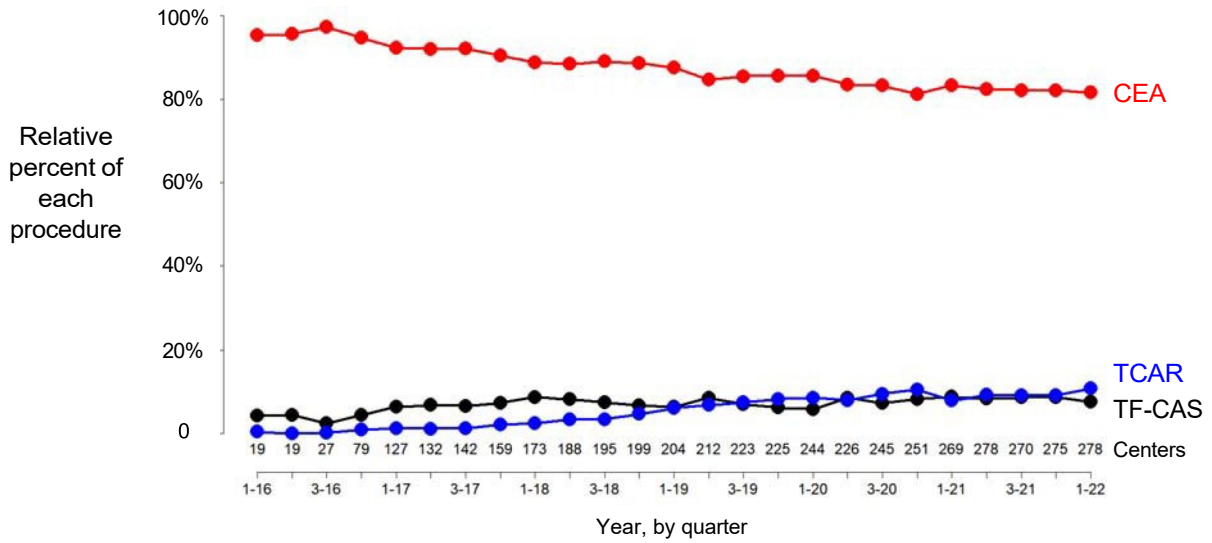

**Figure S7:** Scatter plot demonstrating the percent of procedures that an individual proceduralist performed in 2015 that were TF-CAS, against the percent of procedures performed by that same person in 2020 that were TF-CAS, TCAR, or CEA among all proceduralists with data in both timepoints (Panel A) and after limiting to proceduralists with at least 5 cases in 2015 (Panel B).

**All proceduralists with data in 2015 AND 2020:**

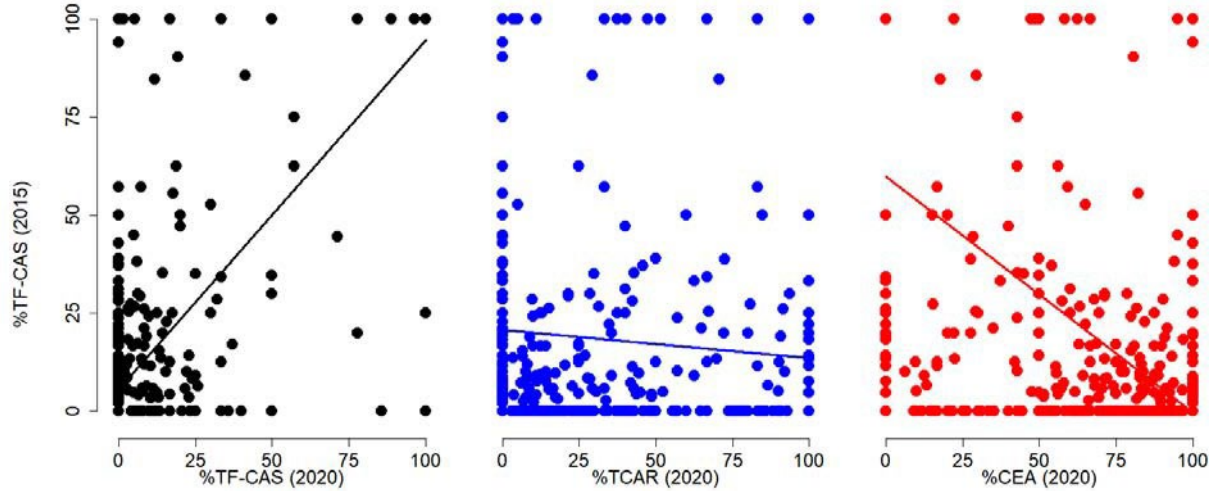

1. [Black]. Correlation 0.85 (95% CI: 0.83 to 0.87) p-value < 0.0001
2. [Blue] -0.06 (-0.13 to 0.01) p-value = 0.1055
3. [Red] -0.68 (-0.71 to -0.6) p-value < 0.0001

**After excluding proceduralists with less than 5 procedures in 2015:**

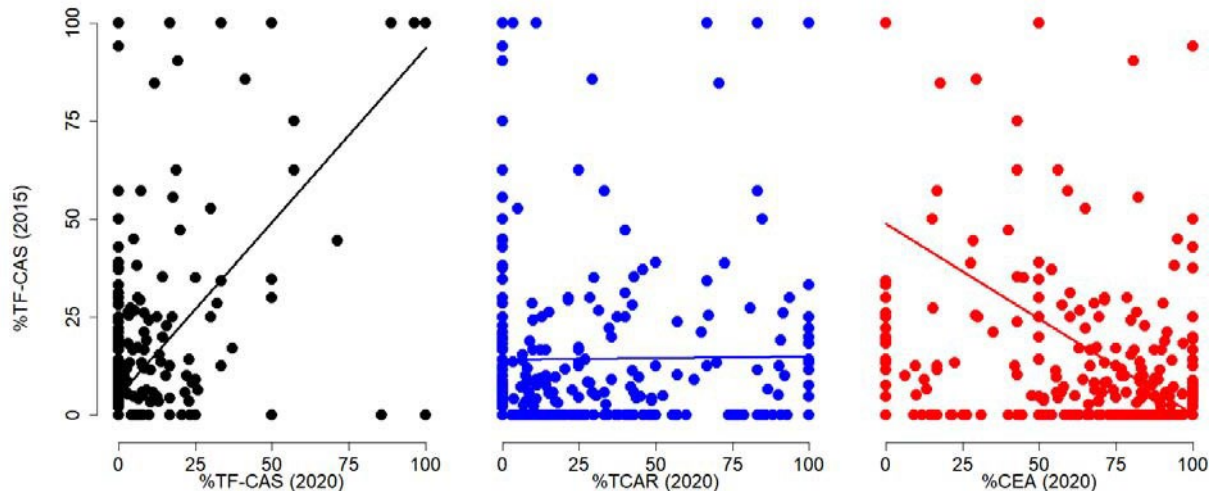

- 1 [Black] 0.83 (0.80 to 0.85) p-value < 0.0001
2. [Blue] 0.01 (-0.08 to 0.09) p-value = 0.8408
3. [Red] -0.62 (-0.67 to -0.56) p-value < 0.0001

**Figure S8:** Density of propensity scores of **high-risk** patients receiving TCAR, CEA, and TF-CAS, demonstrating that patients receiving TCAR are similar to either CEA or TF-CAS patients, while patients receiving CEA and TF-CAS are relatively distinct from each other.

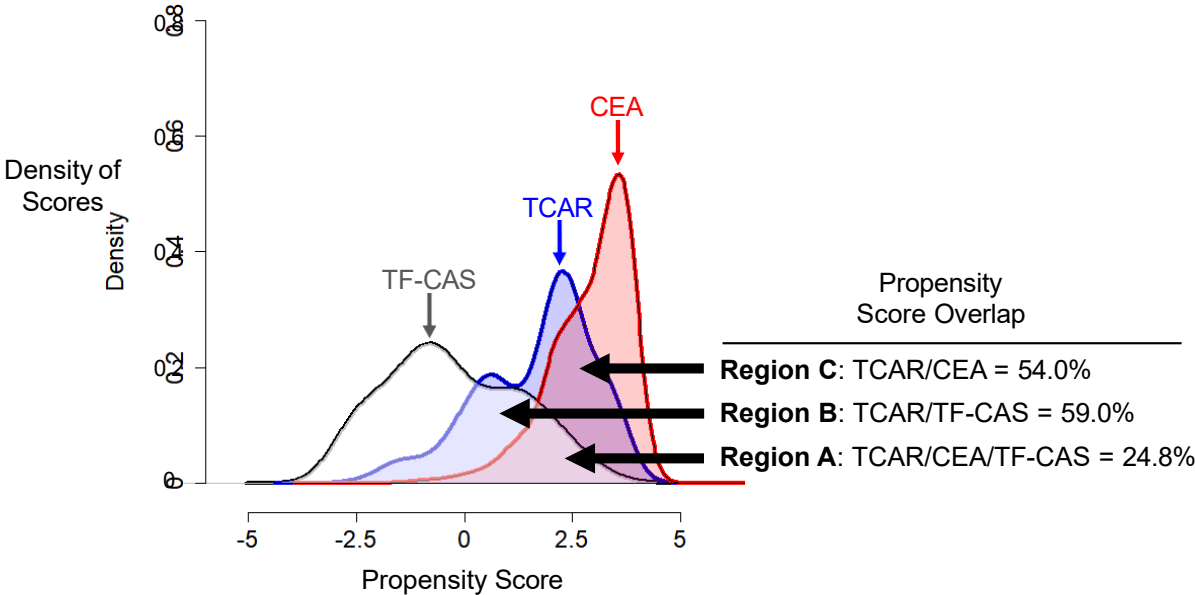

**Figure S9:** Density of propensity scores of **standard-risk** patients receiving TCAR, CEA, and TF-CAS, demonstrating that patients receiving TCAR are similar to either CEA or TF-CAS patients, while patients receiving CEA and TF-CAS are relatively distinct from each other.

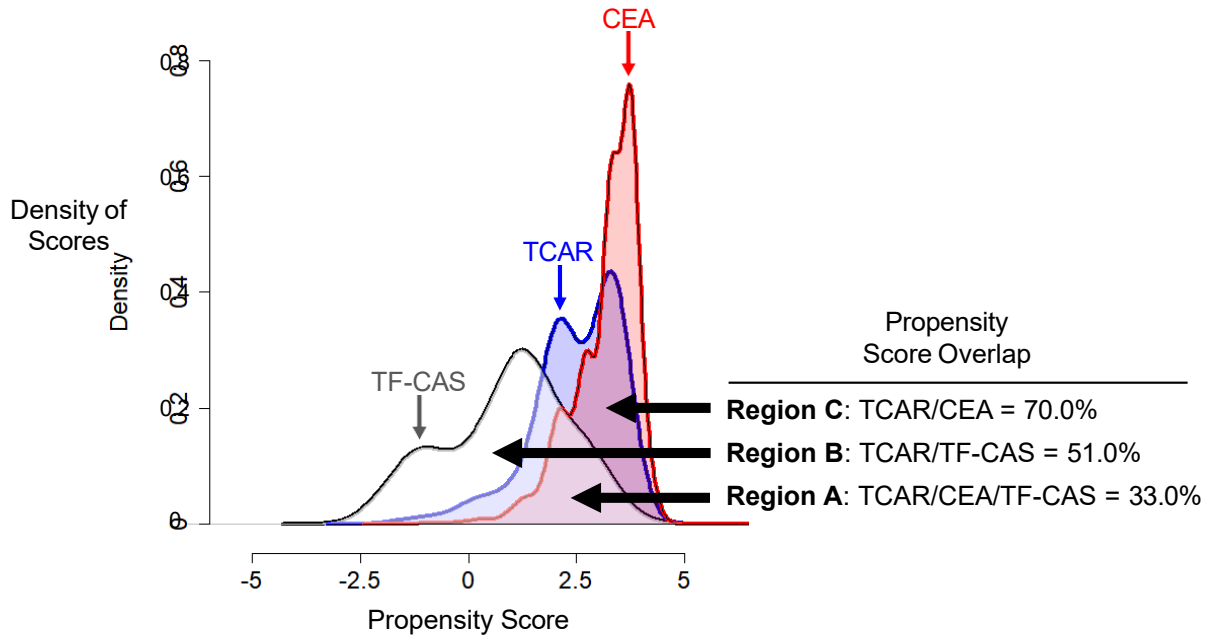

**Figure S10:** Distribution of SVS VQI Physician Specialties, available at: “www.vqi.org”

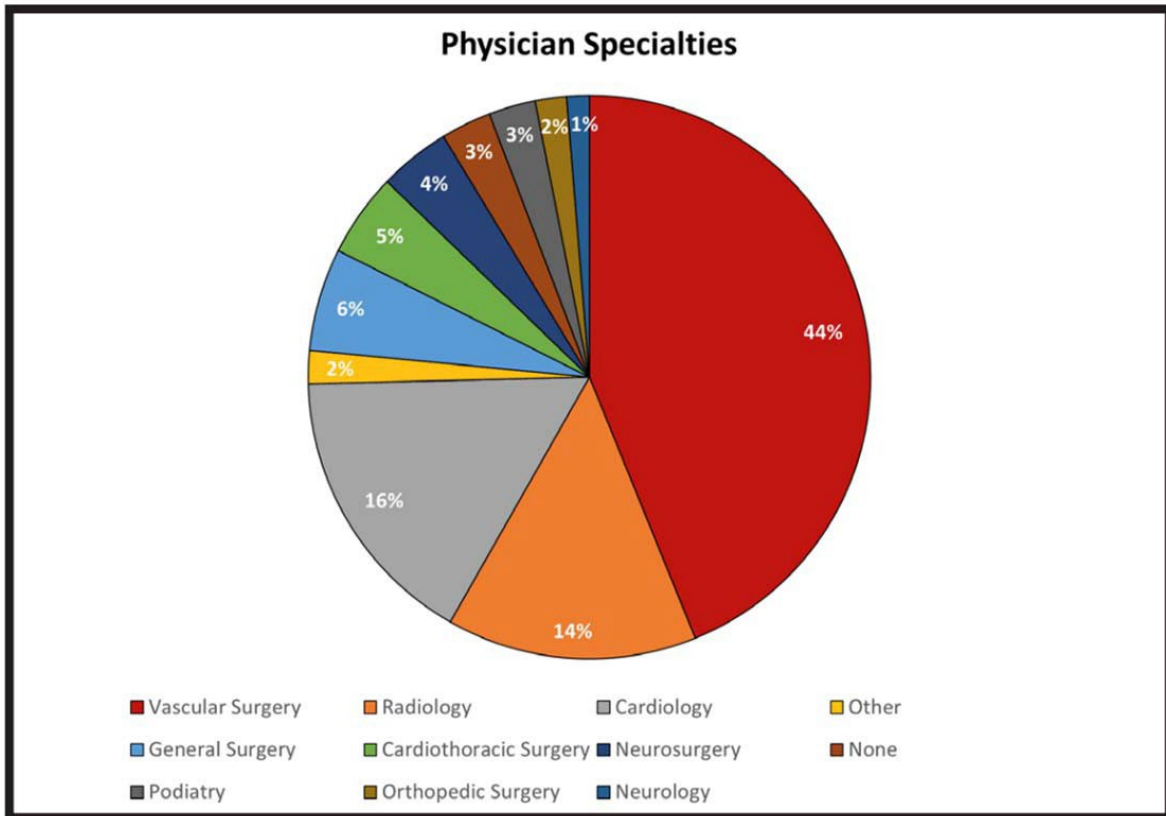

Source: Fivos PATHWAYS Data, Jan 2022

**Figure 4.3:** Distribution of SVS VQI Physician Specialties

**Table S1:** Characteristics of patients who underwent TF-CAS by year and overall.

| Variable                              | Year  |      |        |      |        |      |        |      |        |      |        |      |           |      | Totals |       |         |
|---------------------------------------|-------|------|--------|------|--------|------|--------|------|--------|------|--------|------|-----------|------|--------|-------|---------|
|                                       | 2016  |      | 2017   |      | 2018   |      | 2019   |      | 2020   |      | 2021   |      | 2022 [Q1] |      |        |       | p-value |
|                                       | n=430 | %    | n=2525 | %    | n=3403 | %    | n=3738 | %    | n=3716 | %    | n=5044 | %    | n=1106    | %    |        |       |         |
| Age mean (SD), years                  | 69.3  | 8.8  | 69.7   | 9.5  | 70.2   | 9.6  | 70.3   | 9.5  | 70.3   | 9.9  | 70.7   | 9.9  | 70.5      | 9.6  | <0.001 | 70.3  | 9.7     |
| Female                                | 165   | 38.4 | 913    | 36.2 | 1191   | 35.0 | 1328   | 35.5 | 1310   | 35.3 | 1855   | 36.8 | 389       | 35.2 | 0.517  | 7151  | 35.8    |
| Race                                  |       |      |        |      |        |      |        |      |        |      |        |      |           |      |        |       |         |
| White                                 | 377   | 87.7 | 2274   | 90.1 | 3000   | 88.2 | 3324   | 88.9 | 3322   | 89.4 | 4464   | 88.6 | 976       | 88.3 | 0.223  | 17737 | 88.9    |
| Black or African American             | 19    | 4.4  | 126    | 5.0  | 229    | 6.7  | 232    | 6.2  | 211    | 5.7  | 301    | 6.0  | 83        | 7.5  | 0.020  | 1201  | 6.0     |
| Unknown/Other                         | 16    | 3.7  | 85     | 3.4  | 116    | 3.4  | 125    | 3.3  | 129    | 3.5  | 184    | 3.7  | 29        | 2.6  | 0.790  | 684   | 3.4     |
| Asian                                 | 9     | 2.1  | 28     | 1.1  | 47     | 1.4  | 37     | 1.0  | 39     | 1.0  | 49     | 1.0  | 12        | 1.1  | 0.271  | 221   | 1.1     |
| American Indian / Alaskan Native      | 6     | 1.4  | 6      | 0.2  | 7      | 0.2  | 11     | 0.3  | 7      | 0.2  | 27     | 0.5  | 3         | 0.3  | <0.001 | 67    | 0.3     |
| More than 1 race                      | 2     | 0.5  | 3      | 0.1  | 1      | 0.0  | 7      | 0.2  | 5      | 0.1  | 10     | 0.2  | 1         | 0.1  | 0.239  | 29    | 0.1     |
| Native Hawaiian / Pacific Islander    | 1     | 0.2  | 2      | 0.1  | 3      | 0.1  | 1      | 0.0  | 2      | 0.1  | 6      | 0.1  | 1         | 0.1  | 0.691  | 16    | 0.1     |
| Symptomatic*                          | 223   | 53.7 | 1492   | 60.1 | 2115   | 63.4 | 2245   | 61.6 | 2332   | 64.0 | 3001   | 60.8 | 700       | 64.6 | <0.001 | 12108 | 62.0    |
| Stroke                                | 134   | 31.7 | 948    | 37.9 | 1444   | 42.9 | 1549   | 41.9 | 1611   | 43.8 | 2180   | 43.6 | 485       | 44.1 | <0.001 | 8351  | 42.2    |
| Cortical TIA                          | 73    | 17.4 | 492    | 19.7 | 627    | 18.7 | 665    | 18.1 | 661    | 18.0 | 805    | 16.2 | 199       | 18.3 | 0.009  | 3522  | 17.9    |
| Amaurosis                             | 37    | 8.8  | 194    | 7.8  | 267    | 8.0  | 247    | 6.7  | 276    | 7.5  | 296    | 6.0  | 73        | 6.7  | 0.004  | 1390  | 7.1     |
| Vertebrobasilar or other              | 15    | 3.5  | 84     | 3.4  | 89     | 2.6  | 113    | 3.1  | 117    | 3.2  | 124    | 2.5  | 31        | 2.8  | 0.250  | 573   | 2.9     |
| Prior ipsilateral carotid procedure   | 107   | 24.9 | 653    | 25.9 | 756    | 22.2 | 675    | 18.1 | 635    | 17.1 | 745    | 14.8 | 160       | 14.5 | <0.001 | 3731  | 18.7    |
| Prior contralateral carotid procedure | 70    | 16.3 | 378    | 15.0 | 480    | 14.1 | 458    | 12.3 | 472    | 12.7 | 547    | 10.8 | 147       | 13.3 | <0.001 | 2552  | 12.8    |
| Anatomic high risk                    | 206   | 48.4 | 1171   | 46.6 | 1456   | 43.3 | 1461   | 39.7 | 1476   | 40.1 | 1767   | 35.4 | 374       | 34.0 | <0.001 | 7911  | 40.0    |
| Medical high risk                     | 148   | 34.7 | 920    | 36.6 | 1311   | 39.0 | 1446   | 39.3 | 1434   | 39.0 | 2005   | 40.2 | 466       | 42.3 | 0.008  | 7730  | 39.1    |
| Both                                  | 47    | 11.0 | 309    | 12.3 | 429    | 12.8 | 452    | 12.3 | 456    | 12.4 | 598    | 12.0 | 139       | 12.6 | 0.931  | 2430  | 12.3    |
| Standard risk**                       | 119   | 27.9 | 733    | 29.1 | 1026   | 30.5 | 1229   | 33.4 | 1224   | 33.3 | 1815   | 36.4 | 400       | 36.3 | <0.001 | 6546  | 33.1    |
| CAD                                   | 200   | 47.1 | 1166   | 46.2 | 1482   | 43.6 | 1750   | 46.9 | 1705   | 45.9 | 2426   | 48.2 | 545       | 49.4 | 0.001  | 9274  | 46.5    |
| CHF                                   | 80    | 18.6 | 462    | 18.3 | 589    | 17.3 | 610    | 16.3 | 616    | 16.6 | 817    | 16.2 | 210       | 19.0 | 0.086  | 3384  | 17.0    |
| Prior coronary revascularization      | 171   | 39.8 | 971    | 38.5 | 1258   | 37.0 | 1388   | 37.1 | 1296   | 34.9 | 1798   | 35.6 | 447       | 40.4 | 0.003  | 7329  | 36.7    |
| HTN                                   | 367   | 86.6 | 2247   | 89.1 | 3022   | 88.8 | 3335   | 89.3 | 3316   | 89.3 | 4532   | 89.9 | 990       | 89.6 | 0.423  | 17809 | 89.3    |
| COPD                                  | 109   | 25.3 | 731    | 29.0 | 924    | 27.2 | 1025   | 27.4 | 937    | 25.2 | 1206   | 23.9 | 258       | 23.4 | <0.001 | 5190  | 26.0    |
| Oxygen                                | 12    | 2.8  | 95     | 3.8  | 147    | 4.3  | 150    | 4.0  | 128    | 3.4  | 163    | 3.2  | 41        | 3.7  | 0.149  | 736   | 3.7     |
| Diabetes                              | 169   | 39.4 | 973    | 38.5 | 1322   | 38.9 | 1462   | 39.1 | 1477   | 39.8 | 2038   | 40.4 | 442       | 40.0 | 0.703  | 7883  | 39.5    |
| CKD                                   | 27    | 6.3  | 166    | 6.6  | 212    | 6.2  | 247    | 6.6  | 220    | 5.9  | 301    | 6.0  | 70        | 6.3  | 0.851  | 1243  | 6.2     |
| Smoking                               |       |      |        |      |        |      |        |      |        |      |        |      |           |      |        |       |         |
| Never                                 | 119   | 27.8 | 596    | 23.6 | 912    | 26.8 | 969    | 26.0 | 976    | 26.3 | 1451   | 28.8 | 291       | 26.4 | <0.001 | 5314  | 26.7    |
| Prior                                 | 118   | 27.6 | 727    | 28.8 | 921    | 27.1 | 1011   | 27.1 | 1037   | 27.9 | 1296   | 25.7 | 298       | 27.0 | 0.124  | 5408  | 27.1    |
| Current                               | 191   | 44.6 | 1199   | 47.5 | 1565   | 46.1 | 1750   | 46.9 | 1701   | 45.8 | 2293   | 45.5 | 513       | 46.6 | 0.629  | 9212  | 46.2    |
| Obese                                 | 144   | 34.5 | 867    | 34.6 | 1208   | 35.7 | 1356   | 36.4 | 1347   | 36.5 | 1755   | 34.9 | 398       | 36.2 | 0.561  | 7075  | 35.6    |
| Preop medications                     |       |      |        |      |        |      |        |      |        |      |        |      |           |      |        |       |         |
| Aspirin                               | 376   | 87.4 | 2172   | 86.0 | 2956   | 86.9 | 3225   | 86.3 | 3172   | 85.4 | 4294   | 85.2 | 927       | 83.9 | 0.110  | 17122 | 85.8    |
| P2Y12 inhibitor                       | 335   | 78.1 | 1935   | 76.7 | 2602   | 76.5 | 2933   | 78.5 | 2873   | 77.4 | 3904   | 77.5 | 859       | 77.7 | 0.527  | 15441 | 77.4    |
| DAPT                                  | 305   | 71.1 | 1756   | 69.6 | 2396   | 70.4 | 2686   | 71.9 | 2626   | 70.8 | 3541   | 70.3 | 770       | 69.7 | 0.533  | 14080 | 70.6    |
| Statin                                | 353   | 82.1 | 2069   | 82.0 | 2832   | 83.3 | 3118   | 83.5 | 3157   | 85.1 | 4215   | 83.6 | 946       | 85.6 | 0.020  | 16690 | 83.7    |
| Beta-blocker                          | 230   | 53.6 | 1393   | 55.3 | 1775   | 52.2 | 1983   | 53.1 | 1892   | 51.0 | 2627   | 52.1 | 563       | 51.0 | 0.042  | 10463 | 52.5    |
| Anticoagulation                       | 53    | 12.4 | 292    | 11.6 | 440    | 12.9 | 497    | 13.3 | 540    | 14.6 | 762    | 15.1 | 191       | 17.3 | <0.001 | 2775  | 13.9    |
| ACE inhibitor                         | 226   | 52.7 | 1287   | 51.0 | 1709   | 50.2 | 1788   | 47.9 | 1831   | 49.4 | 2542   | 50.4 | 532       | 48.2 | 0.094  | 9915  | 49.7    |
| Preop functional status               |       |      |        |      |        |      |        |      |        |      |        |      |           |      |        |       |         |
| Independent                           | 400   | 96.4 | 2408   | 96.0 | 3202   | 95.5 | 3561   | 95.8 | 3533   | 95.6 | 4801   | 95.5 | 1065      | 96.4 | 0.764  | 18970 | 95.7    |
| Assist required                       | 14    | 3.4  | 96     | 3.8  | 149    | 4.4  | 148    | 4.0  | 149    | 4.0  | 216    | 4.3  | 37        | 3.3  | 0.637  | 809   | 4.1     |
| Unable to get out of bed              | 1     | 0.2  | 4      | 0.2  | 3      | 0.1  | 7      | 0.2  | 13     | 0.4  | 9      | 0.2  | 3         | 0.3  | 0.329  | 40    | 0.2     |
| Urgency                               |       |      |        |      |        |      |        |      |        |      |        |      |           |      |        |       |         |
| Elective                              | 335   | 77.9 | 1937   | 76.7 | 2596   | 76.3 | 2796   | 74.8 | 2669   | 71.9 | 3679   | 73.0 | 795       | 71.9 | <0.001 | 14807 | 74.2    |
| Urgent                                | 80    | 18.6 | 494    | 19.6 | 668    | 19.6 | 771    | 20.6 | 837    | 22.5 | 1094   | 21.7 | 249       | 22.5 | 0.009  | 4193  | 21.0    |
| Emergent                              | 15    | 3.5  | 93     | 3.7  | 139    | 4.1  | 169    | 4.5  | 208    | 5.6  | 269    | 5.3  | 62        | 5.6  | 0.001  | 955   | 4.8     |
| General Anesthesia                    | 68    | 15.8 | 416    | 16.5 | 577    | 17.0 | 791    | 21.2 | 852    | 22.9 | 1124   | 22.3 | 247       | 22.3 | <0.001 | 4075  | 20.4    |
| Intraoperative heparin                | 384   | 96.7 | 2383   | 96.7 | 3282   | 96.6 | 3614   | 97.2 | 3585   | 96.8 | 4839   | 96.1 | 1059      | 95.8 | 0.131  | 19146 | 95.9    |
| Intraoperative protamine              | 46    | 13.2 | 341    | 15.8 | 466    | 16.0 | 509    | 15.8 | 505    | 15.4 | 579    | 13.3 | 118       | 12.5 | 0.002  | 2564  | 14.9    |

\* Patients may have more than one symptomatic subtype upon presentation.

\*\* Patients with neither anatomic or medical high risk criteria.

SD: Standard deviation; TCAR, transcatheter carotid artery revascularization ;TF-CAS, transfemoral carotid artery stenting; TIA, transient ischemic attack; Anatomic / Medical high risk as defined by the Centers for Medicare and Medicaid Services; CAD, coronary artery disease; CHF, congestive heart failure; HTN, hypertension; COPD, chronic obstructive pulmonary disease; CKD, chronic kidney disease defined as creatinine >1.7 mg/dL; DAPT, dual antiplatelet therapy, and ACE, Angiotensin-converting enzyme.

**Table S2:** Characteristics of patients who underwent CEA by year and overall.

| Variable                              | Year    |      | 2016    |      | 2017    |      | 2018    |      | 2019    |      | 2020    |      | 2021   |      | 2022 [Q1] |       | p-value | Totals |  |
|---------------------------------------|---------|------|---------|------|---------|------|---------|------|---------|------|---------|------|--------|------|-----------|-------|---------|--------|--|
|                                       | n=15957 | %    | n=17624 | %    | n=18194 | %    | n=19213 | %    | n=16656 | %    | n=18397 | %    | n=4091 | %    | n=110,132 | %     |         |        |  |
| Age mean (SD), years                  | 70.4    | 9.5  | 70.7    | 9.6  | 70.7    | 9.5  | 70.8    | 9.4  | 70.9    | 9.2  | 70.9    | 9.4  | 71.0   | 9.0  | <0.001    | 70.7  | 9.4     |        |  |
| Female                                | 6320    | 39.6 | 6877    | 39.0 | 7302    | 40.1 | 7531    | 39.2 | 6473    | 38.9 | 7128    | 38.7 | 1628   | 39.8 | 0.097     | 43259 | 39.3    |        |  |
| Race                                  |         |      |         |      |         |      |         |      |         |      |         |      |        |      |           |       |         |        |  |
| White                                 | 14466   | 90.7 | 15858   | 90.0 | 16234   | 89.3 | 17059   | 88.8 | 14840   | 89.1 | 16422   | 89.3 | 3661   | 89.6 | <0.001    | 98540 | 89.5    |        |  |
| Black or African American             | 802     | 5.0  | 862     | 4.9  | 871     | 4.8  | 892     | 4.6  | 771     | 4.6  | 884     | 4.8  | 200    | 4.9  | 0.641     | 5282  | 4.8     |        |  |
| Unknown/Other                         | 411     | 2.6  | 628     | 3.6  | 794     | 4.4  | 941     | 4.9  | 772     | 4.6  | 773     | 4.2  | 139    | 3.4  | <0.001    | 4458  | 4.0     |        |  |
| Asian                                 | 192     | 1.2  | 189     | 1.1  | 205     | 1.1  | 217     | 1.1  | 163     | 1.0  | 199     | 1.1  | 50     | 1.2  | 0.570     | 1215  | 1.1     |        |  |
| American Indian / Alaskan             |         |      |         |      |         |      |         |      |         |      |         |      |        |      |           |       |         |        |  |
| Native                                | 49      | 0.3  | 34      | 0.2  | 39      | 0.2  | 52      | 0.3  | 55      | 0.3  | 65      | 0.4  | 16     | 0.4  | 0.022     | 310   | 0.3     |        |  |
| More than 1 race                      | 25      | 0.2  | 23      | 0.1  | 29      | 0.2  | 25      | 0.1  | 24      | 0.1  | 36      | 0.2  | 20     | 0.5  | <0.001    | 182   | 0.2     |        |  |
| Native Hawaiian / Pacific Islander    | 9       | 0.1  | 18      | 0.1  | 16      | 0.1  | 15      | 0.1  | 22      | 0.1  | 7       | 0.0  | 2      | 0.0  | 0.053     | 89    | 0.1     |        |  |
| Symptomatic*                          | 5374    | 33.7 | 6038    | 34.3 | 6288    | 34.6 | 6806    | 35.5 | 6558    | 39.5 | 7103    | 38.7 | 1598   | 39.2 | <0.001    | 39765 | 36.2    |        |  |
| Stroke                                | 2583    | 16.2 | 3173    | 18.0 | 3477    | 19.1 | 3733    | 19.5 | 3707    | 22.3 | 4116    | 22.4 | 933    | 22.9 | <0.001    | 21722 | 19.8    |        |  |
| Cortical TIA                          | 1501    | 9.4  | 1564    | 8.9  | 1530    | 8.4  | 1727    | 9.0  | 1558    | 9.4  | 1665    | 9.1  | 373    | 9.1  | 0.029     | 9918  | 9.0     |        |  |
| Amaurosis                             | 1218    | 7.6  | 1233    | 7.0  | 1212    | 6.7  | 1224    | 6.4  | 1213    | 7.3  | 1221    | 6.7  | 280    | 6.9  | <0.001    | 7601  | 6.9     |        |  |
| Vertebrobasilar or other              | 388     | 2.4  | 371     | 2.1  | 365     | 2.0  | 450     | 2.3  | 417     | 2.5  | 465     | 2.5  | 85     | 2.1  | 0.003     | 2541  | 2.3     |        |  |
| Prior ipsilateral carotid procedure   | 330     | 2.1  | 361     | 2.0  | 326     | 1.8  | 294     | 1.5  | 278     | 1.7  | 259     | 1.4  | 49     | 1.2  | <0.001    | 1897  | 1.7     |        |  |
| Prior contralateral carotid procedure | 2221    | 13.9 | 2372    | 13.5 | 2503    | 13.8 | 2624    | 13.7 | 2161    | 13.0 | 2402    | 13.1 | 509    | 12.4 | 0.025     | 14792 | 13.4    |        |  |
| Anatomic high risk                    | 791     | 5.0  | 763     | 4.3  | 731     | 4.0  | 695     | 3.6  | 595     | 3.6  | 582     | 3.2  | 116    | 2.8  | <0.001    | 4273  | 3.9     |        |  |
| Standard risk**                       | 11298   | 70.8 | 12465   | 70.7 | 13129   | 72.2 | 14094   | 73.4 | 12063   | 72.4 | 13587   | 73.9 | 3026   | 74.0 | <0.001    | 79662 | 72.3    |        |  |
| CAD                                   | 4291    | 26.9 | 4857    | 27.6 | 4728    | 26.0 | 4925    | 25.6 | 4305    | 25.9 | 4814    | 26.2 | 1066   | 26.1 | <0.001    | 28986 | 26.3    |        |  |
| CHF                                   | 1809    | 11.3 | 2010    | 11.4 | 2025    | 11.1 | 2265    | 11.8 | 2013    | 12.1 | 2345    | 12.8 | 490    | 12.0 | <0.001    | 12957 | 11.8    |        |  |
| Prior coronary revascularization      | 5548    | 34.8 | 6195    | 35.2 | 6151    | 33.8 | 6484    | 33.7 | 5541    | 33.3 | 6053    | 32.9 | 1269   | 31.0 | <0.001    | 37241 | 33.8    |        |  |
| HTN                                   | 14208   | 89.1 | 15741   | 89.4 | 16219   | 89.3 | 17150   | 89.6 | 14965   | 90.0 | 16701   | 90.8 | 3705   | 90.6 | <0.001    | 98689 | 89.7    |        |  |
| COPD                                  | 3674    | 23.0 | 4124    | 23.4 | 4306    | 23.7 | 4483    | 23.3 | 3738    | 22.5 | 4148    | 22.6 | 955    | 23.4 | 0.063     | 25428 | 23.1    |        |  |
| Oxygen                                | 343     | 2.2  | 385     | 2.2  | 393     | 2.2  | 449     | 2.3  | 362     | 2.2  | 382     | 2.1  | 78     | 1.9  | 0.590     | 2392  | 2.2     |        |  |
| Diabetes                              | 5717    | 35.8 | 6450    | 36.6 | 6625    | 36.4 | 7092    | 36.9 | 6103    | 36.7 | 6862    | 37.3 | 1565   | 38.3 | 0.037     | 40414 | 36.7    |        |  |
| CKD                                   | 903     | 5.7  | 975     | 5.5  | 996     | 5.5  | 1004    | 5.2  | 886     | 5.3  | 1018    | 5.5  | 222    | 5.4  | 0.638     | 6004  | 5.5     |        |  |
| Smoking                               |         |      |         |      |         |      |         |      |         |      |         |      |        |      |           |       |         |        |  |
| Never                                 | 4010    | 25.1 | 4509    | 25.6 | 4665    | 25.7 | 5117    | 26.6 | 4429    | 26.6 | 4976    | 27.1 | 1112   | 27.2 | <0.001    | 28818 | 26.2    |        |  |
| Prior                                 | 4089    | 25.6 | 4405    | 25.0 | 4573    | 25.1 | 4741    | 24.7 | 4174    | 25.1 | 4717    | 25.6 | 1067   | 26.1 | 0.206     | 27766 | 25.2    |        |  |
| Current                               | 7848    | 49.2 | 8703    | 49.4 | 8949    | 49.2 | 9350    | 48.7 | 8033    | 48.3 | 8700    | 47.3 | 1912   | 46.7 | <0.001    | 53495 | 48.6    |        |  |
| Obese                                 | 5514    | 34.6 | 6152    | 34.9 | 6199    | 34.2 | 6630    | 34.6 | 5771    | 34.7 | 6319    | 34.4 | 1391   | 34.1 | 0.777     | 37976 | 34.5    |        |  |
| Preop medications                     |         |      |         |      |         |      |         |      |         |      |         |      |        |      |           |       |         |        |  |
| Aspirin                               | 13272   | 83.2 | 14819   | 84.1 | 15390   | 84.6 | 16207   | 84.4 | 14099   | 84.7 | 15437   | 84.1 | 3436   | 84.5 | 0.005     | 92660 | 84.2    |        |  |

|                          |       |      |       |      |       |      |       |      |       |      |       |      |      |      |        |        |      |
|--------------------------|-------|------|-------|------|-------|------|-------|------|-------|------|-------|------|------|------|--------|--------|------|
| P2Y12 inhibitor          | 5284  | 33.1 | 6120  | 34.7 | 6642  | 36.5 | 7247  | 37.7 | 6819  | 41.0 | 7657  | 41.7 | 1682 | 41.3 | <0.001 | 41451  | 37.7 |
| DAPT                     | 4350  | 27.3 | 5094  | 28.9 | 5658  | 31.1 | 6146  | 32.0 | 5834  | 35.0 | 6569  | 35.8 | 1462 | 35.9 | <0.001 | 35113  | 31.9 |
| Statin                   | 13183 | 82.6 | 14728 | 83.6 | 15482 | 85.1 | 16578 | 86.3 | 14625 | 87.9 | 15960 | 86.9 | 3577 | 88.0 | <0.001 | 94133  | 85.5 |
| Beta-blocker             | 8830  | 55.4 | 9537  | 54.1 | 9788  | 53.8 | 10431 | 54.3 | 8962  | 53.8 | 9747  | 53.1 | 2110 | 51.9 | <0.001 | 59405  | 54.0 |
| Anticoagulation          | 1119  | 7.0  | 1306  | 7.4  | 1206  | 6.6  | 1308  | 6.8  | 996   | 6.0  | 997   | 5.4  | 262  | 6.4  | <0.001 | 7194   | 6.5  |
| ACE inhibitor            | 8471  | 53.1 | 9368  | 53.2 | 9738  | 53.6 | 10306 | 53.7 | 8835  | 53.1 | 9933  | 54.1 | 2242 | 55.1 | 0.120  | 58893  | 53.5 |
| Preop functional status  |       |      |       |      |       |      |       |      |       |      |       |      |      |      |        |        |      |
| Independent              | 15741 | 98.7 | 17354 | 98.5 | 17935 | 98.8 | 18957 | 98.7 | 16450 | 98.9 | 18133 | 98.7 | 4033 | 98.7 | 0.132  | 108603 | 98.7 |
| Assist required          | 197   | 1.2  | 246   | 1.4  | 218   | 1.2  | 231   | 1.2  | 168   | 1.0  | 235   | 1.3  | 47   | 1.2  | 0.075  | 1342   | 1.2  |
| Unable to get out of bed | 10    | 0.1  | 12    | 0.1  | 8     | 0.0  | 15    | 0.1  | 14    | 0.1  | 10    | 0.1  | 6    | 0.1  | 0.345  | 75     | 0.1  |
| Urgency                  |       |      |       |      |       |      |       |      |       |      |       |      |      |      |        |        |      |
| Elective                 | 13974 | 87.6 | 15493 | 87.9 | 15838 | 87.1 | 16610 | 86.5 | 14040 | 84.3 | 15689 | 85.3 | 3421 | 83.6 | <0.001 | 95065  | 86.3 |
| Urgent                   | 1891  | 11.9 | 2030  | 11.5 | 2236  | 12.3 | 2488  | 13.0 | 2532  | 15.2 | 2630  | 14.3 | 648  | 15.8 | <0.001 | 14455  | 13.1 |
| Emergent                 | 87    | 0.5  | 100   | 0.6  | 117   | 0.6  | 113   | 0.6  | 82    | 0.5  | 75    | 0.4  | 22   | 0.5  | 0.078  | 596    | 0.5  |
| General Anesthesia       | 14630 | 91.7 | 16263 | 92.3 | 16876 | 92.8 | 17970 | 93.5 | 15610 | 93.7 | 17442 | 94.8 | 3903 | 95.4 | <0.001 | 102694 | 93.3 |
| Intraoperative heparin   | 15807 | 99.1 | 17459 | 99.1 | 18014 | 99.0 | 19066 | 99.3 | 16516 | 99.2 | 18200 | 98.9 | 4063 | 99.3 | 0.032  | 109125 | 99.1 |
| Intraoperative protamine | 11338 | 71.1 | 12572 | 71.3 | 13065 | 71.8 | 14001 | 72.9 | 12654 | 76.0 | 14406 | 78.3 | 3316 | 81.1 | <0.001 | 81352  | 73.9 |

\* Patients may have more than one symptomatic subtype upon presentation. \*\* Patients with neither anatomic or medical high risk criteria.

SD: Standard deviation; TCAR, transcarotid artery revascularization; TIA, transient ischemic attack; Anatomic high risk as defined by the Centers for Medicare and Medicaid Services; CAD, coronary artery disease; CHF, congestive heart failure; HTN, hypertension; COPD, chronic obstructive pulmonary disease; CKD, chronic kidney disease defined as creatinine >1.7 mg/dL; DAPT, dual antiplatelet therapy; ACE, Angiotensin-converting enzyme.



**Table S3:** TCAR uptake over time by region of the United States.

Number of patients receiving TCAR by region

| Region | 2016 | 2017 | 2018 | 2019 | 2020 | 2021 | 2022 | Total |
|--------|------|------|------|------|------|------|------|-------|
| East   | 55   | 408  | 863  | 1521 | 1884 | 2446 | 550  | 7727  |
| North  | 36   | 308  | 824  | 1829 | 1964 | 2288 | 536  | 7785  |
| South  | 14   | 389  | 1355 | 2314 | 2705 | 3482 | 882  | 11141 |
| West   | 26   | 272  | 537  | 955  | 1156 | 1484 | 364  | 4794  |

Number of centers providing TCAR by region

| Region | 2016 | 2017 | 2018 | 2019 | 2020 | 2021 | 2022 | Total |
|--------|------|------|------|------|------|------|------|-------|
| East   | 14   | 42   | 69   | 94   | 123  | 134  | 109  | 153   |
| North  | 6    | 24   | 60   | 103  | 120  | 138  | 117  | 158   |
| South  | 6    | 39   | 74   | 108  | 139  | 173  | 140  | 195   |
| West   | 3    | 17   | 36   | 55   | 70   | 87   | 66   | 100   |

**Table S4:** Percent of carotid revascularization procedures that were TCAR in 2021/2022 stratified by TF-CAS use in 2015, determining whether centers who use TF-CAS more frequently were also more or less likely to utilize TCAR over time.

Weighted by volume

| TF-CAS 2015 | N patients | TCAR 2021-2022<br>Mean [range] |
|-------------|------------|--------------------------------|
| 0-10%       | 31924      | 20.8% [8.6 – 36.6]             |
| 10-20%      | 21829      | 18.7% [9.1 – 26.6]             |
| 20-40%      | 18181      | 20.2% [13.2 – 32.1]            |
| 40%-100%    | 2871       | 12.5% [6.9 – 13.5]             |

Unweighted

| TF-CAS 2015 | N Centers | TCAR 2021-2022<br>Mean [range] |
|-------------|-----------|--------------------------------|
| 0-10%       | 94        | 21.0% [10.3 – 40.0]            |
| 10-20%      | 33        | 18.6% [9.3 – 27.5]             |
| 20-40%      | 36        | 20.3% [12.4 – 31.3]            |
| 40%-100%    | 9         | 12.7% [0.0 – 13.5]             |

**Table S5:** Risk of in-hospital stroke or death after TCAR when stratified by proceduralist- or center-level annual TCAR volume.

|                                      | <b>Proceduralist<br/>(TCAR)</b> | <b>Site (TCAR)</b> |
|--------------------------------------|---------------------------------|--------------------|
| <b>&lt;11</b>                        | 272 (1.89%)                     | 108 (1.91%)        |
| <b>11-20</b>                         | 136 (1.47%)                     | 153 (1.90%)        |
| <b>&gt;20</b>                        | 115 (1.47%)                     | 162 (1.46%)        |
| <b>p-Value -unadjusted</b>           | 0.0136                          | 0.0066             |
| <b>p-Value – adjusted for center</b> | 0.0031                          | 0.1700             |
| <b>p-Value – fully adjusted</b>      | 0.0005                          | 0.0660             |
